# Supplementary material for: Synthesis and characterization of photodynamic activity of an iodinated Chlorin p6copper complex
Source: Royal Society of Chemistry journal article supplement (doi:10.1039/c6ra14026b), 2016-01-01
Supplement: c6ra14026b1.pdf [file c6ra14026b1.pdf]

## Supplementary Information

### Synthesis and Characterization of Photodynamic activity of Iodinated Chlorin $p_6$ Copper complex

Paromita Sarbadhikary,<sup>a</sup> Alok Dube<sup>\*a,b</sup> and Pradeep Kumar Gupta<sup>a,b</sup>

**Table S1:** Percent cytotoxicity of IC $p_6$ -Cu in dark at 10 - 15  $\mu$ M concentration.

| Concentration of IC $p_6$ -Cu ( $\mu$ M) | % Cytotoxicity in dark |               |
|------------------------------------------|------------------------|---------------|
|                                          | NT8e                   | 4451          |
| 10                                       | 1.2 $\pm$ 0.8          | 2.1 $\pm$ 1   |
| 12                                       | 3.5 $\pm$ 2.1          | 2.8 $\pm$ 1.2 |
| 15                                       | 5.1 $\pm$ 3.7          | 6.0 $\pm$ 4.5 |

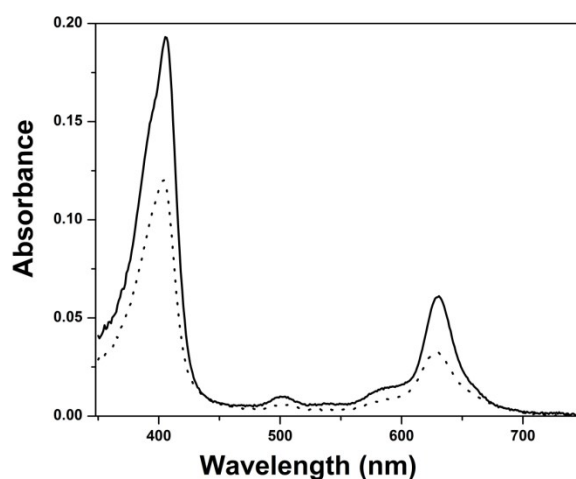

**Figure S1.** Absorption spectra of 2.5  $\mu$ M IC $p_6$ -Cu in methanol (solid line) and 25 mM sodium phosphate buffer (pH 7.4) (dotted line).

**Table S2.** Absorption characteristics of IC $p_6$ -Cu in methanol and buffer.

| Solvent                           | Soret Band ( $\lambda_{\text{max}}$ ) | FWHM  | Q band ( $\lambda_{\text{max}}$ ) | FWHM  |
|-----------------------------------|---------------------------------------|-------|-----------------------------------|-------|
| Methanol                          | 411 nm                                | 36 nm | 634 nm                            | 32 nm |
| Sodium –phosphate buffer (pH 7.4) | 404 nm                                | 42 nm | 630 nm                            | 40 nm |

### Octanol/ water partition coefficient:

Partition coefficients of  $Cp_6$  and  $ICp_6-Cu$  were determined in 1-octanol– sodium phosphate buffer (pH 7.4) system. A saturated solution of octanol and buffer was prepared by vigorous shaking of buffer and octanol mixture for 4 h at room temperature. 10  $\mu$ M of  $Cp_6$  and  $ICp_6-Cu$  was dissolved in pre-saturated buffer phase, to which an equal volume of pre-saturated octanol phase was added. The mixture was mixed for 1 h by intermittent vortexing, centrifuged at 5000 rpm for 5 mins and left at room temperature for  $\sim$ 1 h to allow the two phases to separate. Concentration of  $Cp_6$  and  $ICp_6-Cu$  in both the phases was determined by absorption spectroscopy. The partition coefficients (P) were calculated as:

$$\text{Log } P_{(\text{Oct}/\text{buffer})} = \text{Log } (C_{\text{Oct}} / C_{\text{buffer}})$$

Where,  $C_{\text{Oct}}$  and  $C_{\text{buffer}}$  are concentration of photosensitizer in the organic and the buffer phase, respectively.

**Table S3.** Octanol/ water partition coefficient of  $Cp_6$  and  $ICp_6-Cu$

| Photosensitizer | Log P            |
|-----------------|------------------|
| $Cp_6$          | $0.46 \pm 0.065$ |
| $ICp_6-Cu$      | $0.94 \pm 0.045$ |
